# Supplementary material
Source: publisher figshare collection journal article supplement (https://acs.figshare.com/ndownloader/files/22206195)
Supplement: Supplementary file 1 [file 22206195]

## **Supplemental Information for “Efficient Emission from Core / (Doped) Shell Nanoparticles: Applications for Chemical Sensing”**

Rahul Thakar, Yingchuan Chen, Preston T. Snee

### **Chemicals Used:**

BODIPY 577/618 maleimide (Invitrogen), Diethyl zinc (Strem, 95%), Hexamethyldisilathiane ( $\text{TMS}_2\text{S}$ , Fluka, purum), N-hexylphosphonic acid (HPA, Alfa Aesar) Manganese Chloride (Sigma Aldrich, 99+%), Oleylamine (Fluka, technical grade), Selenium (Alfa Aesar, 99+%), Sodium Hydroxide (Fisher, ACS Certified), Stearic Acid (Fluka, purum), Trioctylphosphine (TOP, Strem, 97%), Trioctylphosphine Oxide (TOPO, Aldrich, 90%, purified by distillation at 220 °C at 200 mTorr), Methanol, Isopropanol, Hexane (Fisher, ACS Certified)

### **Synthesis of Manganese Stearate:**

Manganese stearate was prepared using manganese chloride and stearic acid. A 1.0 g portion of  $\text{MnCl}_2$  was added to 40 mL methanol which was heated to reflux. Next, 4.52 g of stearic acid was added. After the stearic acid melted and mixed with the hot methanol solution, 0.636 g NaOH in methanol was added. The manganese stearate precipitate thus obtained was washed with hot methanol, centrifuged at  $3.9 \times 10^3$  RPM, and washed again for several cycles. The final solution was dried *in vacuo*. The sample was characterized by NMR.

### **Synthesis of ZnSe and ZnSe/ZnMnS:**

The core NCs were synthesized according to a modification of a previously published procedure [1]. First, 12.0 g of oleylamine was degassed at 110 °C at ~200 mTorr in a 4 necked round bottom flask. The system was flushed with dry N<sub>2</sub> and the temperature was raised to 310° C. A solution of 0.099 g diethyl zinc, 0.67 mL of 1.5mM trioctylphosphine selenide (synthesized from Se shot and trioctylphosphine) and 4mL trioctylphosphine were mixed in a vial and injected into the pot while stirring rapidly. Immediately after the solution was annealed for 45 minutes at 270° C and then lowered to 170° C. A solution of 0.042g manganese stearate, 6.0 mL trioctylphosphine, 160 mg hexamethyldisilathiane and 76 mg diethyl zinc was prepared in the glove box in a vial and allowed to stir until a turbid but homogenous mixture was obtained. This was loaded into a syringe and added into the pot at 170° C using an addition funnel. A constant flow (~1 drop / sec) was maintained. The temperature was allowed to cool to room temperature at which point a faint orange emission ( $\lambda = 570\text{nm}$ ) was visible. The ZnSe/ZnMnS NCs were extracted with additional hexane and then precipitated with excess methanol using isopropanol as a co-solvent. A control sample was prepared by addition of manganese stearate in trioctylphosphine to the ZnSe cores without zinc or sulfur precursors.

#### Synthesis of ZnSe/ZnMnS/ZnS:

In a 4 necked 50 mL round bottom flask 10 g trioctylphosphine oxide with 0.4 g n-hexylphosphonic acid and degassed at 160° C at ~200 mTorr. The precipitated ZnSe/ZnMnS NCs were solubilized in hexane and injected into the pot at 80° C upon which hexane was removed. At this point the manganese emission from the ZnSe/ZnMnS NCs became considerably more emissive, which seemed to brighten further as the hexane

was removed. Separate solutions of 80 mg diethyl zinc in 3 mL trioctylphosphine and 160 mg hexamethyldisilathiane in 3ml trioctylphosphine were prepared and loaded into separate 3 mL syringes inside a glove box. These solutions were injected using a syringe pump into the round bottom flask at 170° C through a capillary tube over the course of 2 hours.

#### Water solubilization and dye conjugation:

ZnSe/ZnMnS/ZnS NCs were precipitated from ~1 mL of growth solution with excess isopropanol with a small amount of methanol and centrifuged into a pellet. The pellet was dried and weighed after which a 5× excess (by weight, typically 50-100 mg) of neutralized octylamine modified RAFT synthesized polyacrylic acid was added.[2,3] Next, ~3mL of chloroform was mixed with the solution with ~1 or two drops of methanol to help solubilize the polymer. Care must be used not to add too much methanol. The solution was dried under vacuum upon which pH 7 buffered water was added. The solution was stirred for ~1 hour, filtered with 450 nm Millipore filters and then centrifuged in 50K MW dialysis filters from Millipore. Several portions of pH 7 water were added to the centrifuge filters to remove excess polymer. The solution was filtered again, and separated into equal portions. A small portion of BODIPY 577/618 maleimide was dissolved in dimethylformamide which was then added to the test solution. The NC / dye couple was stirred for two days, dialyzed in 50K MW centrifuge filters to remove excess dye, after which they were characterized using UV/VIS spectrophotometry and steady-state fluorometry. The dye conjugated to the polymers by the natural thiol functionality of the polymers.

### Characterization:

Samples were characterized with a Cary 500 UV/VIS by Varian and a Fluorolog 3 by Jobin Yvon. Time-resolved data on the Perkin Elmer Victor3 using a Dysprosium filter set. Data was taken at 30  $\mu$ s - 4500  $\mu$ s intervals using a 30  $\mu$ s integration time. The experiment was repeated three times and averaged. All data were plotted and analyzed using Matlab scripts. TEM images and EDS elemental analysis were taken with a JEOL JEM-3010 at the UIC Research Resource Center. EPR spectra were taken with a Varian E-109E spectrometer and analyzed using the Matlab suite of software.

### References

1. Hines, M.; Guyot-Sionnest, P. *J. Phys. Chem. B*, **1998**, *102*, 3655.
2. Chiefari, J.; Chong, Y. K.; Ercole, F.; Krstina, J.; Jeffery, J.; Le, T. P. T.; Mayadunne, R. T. A.; Meijs, G. F.; Moad, C. L.; Moad, G.; Rizzardo, E.; Thang, S. H. *Macromol.*, **1998**, *31*, 5559.
3. Wu, X.; Liu, H.; Liu, J.; Haley, K. N.; Treadway, J. A.; Larson, J. P.; Ge, N.; Peale, F.; Bruchez, M. P. *Nat. Biotech.*, **2003**, *21*, 41.

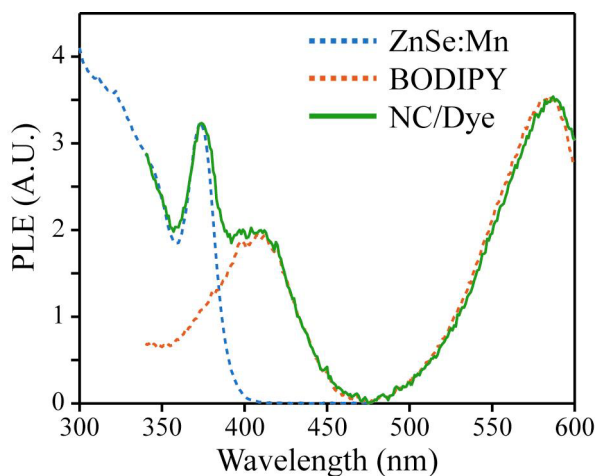

**Figure S1.** Photoluminescence excitation spectra of the ZnSe:Mn / BODIPY conjugated chromophore. The control NC and dye PLE spectra are scaled as a guide to the eye. PLE data was recorded by monitoring the emission at 670 nm where there is minimal overlap (~20%) of the manganese emission over the BODIPY dye, however it is not necessarily clear what percent of the PLE signal comes from the manganese emission.

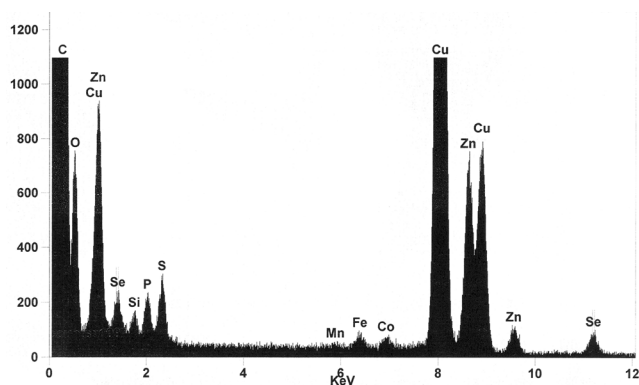

**Figure S2.** EDS elemental analysis of the ZnSe//ZnMnS/ZnS NCs. The presence of the elements Fe, C, Co, Cu and Si are from the microscope and TEM grids.

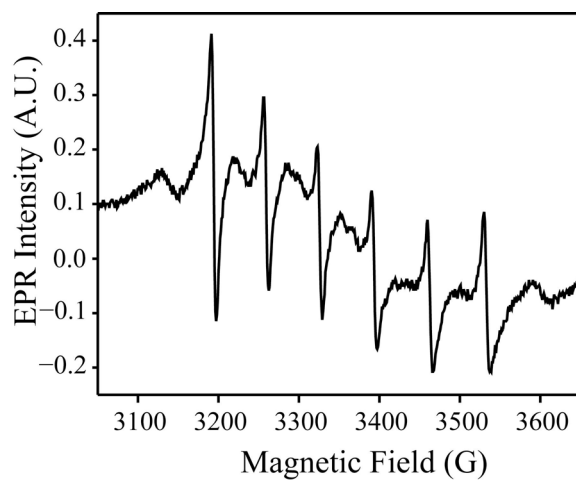

**Figure S3.** EPR spectra of ZnSe//ZnMnS/ZnS NCs. The hyperfine coupling constant of  $63.5 \pm 1.4 \times 10^{-4} \text{ cm}^{-1}$  is indicative of manganese in a zinc sulfide layer.
